# Supplementary material
Source: publisher figshare collection journal article supplement (https://gsapubs.figshare.com/ndownloader/files/32798822)
Supplement: Supplementary file 1 [file 32798822]

## Sheet: Feuil3
TABLE S3. ZIRCON TRACE-ELEMENT COMPOSITIONS IN GRANULITE AND AMPHIBOLITE.
Sample
17JS59 - Granulite - Group II
Spot#			Y	Nb	La	Ce	Pr	Nd	Sm	Eu	Gd	Tb	Dy	Ho	Er	Tm	Yb	Lu	Hf	Ta	†Eu/Eu*
17JS59-01			210.288	3.26513	0.03495	0.484284	0.0799967	0.261497	0.188532	0.150275	1.22108	0.650304	11.8513	6.03502	35.4482	10.5574	115.792	25.1374	12920.8	1.91117	0.0994925
17JS59-02			522.083	1.25387	0	0.0787795	0.00256962	0.00968659	0.0818369	0.0584685	1.33265	1.09016	22.9945	14.0229	93.1739	27.4183	314.325	71.8136	9887.76	0.587801	0.0896249
17JS59-03			88.6069	0.697992	0	1.06948	0.00645321	0.143585	0.459147	0.112438	3.97578	1.09759	9.73646	2.92711	10.1635	1.74225	13.4667	2.69669	9793.48	0.284336	0.160089
17JS59-04			446.624	1.97589	0	0.145763	0	0.0479205	0.180885	0.223024	3.37626	1.75819	30.6558	14.2833	75.2432	17.5624	168.697	35.405	9462.98	0.547443	0.103325
17JS59-05			86.1196	1.0802	0.00121949	0.58126	0.00205579	0.0390671	0.159874	0.082267	1.62152	0.615368	6.98901	2.75781	12.329	2.80874	28.8915	6.74361	9445.12	0.501228	0.142934
17JS59-06			1682.19	6.90347	0.0145875	0.809159	0.000439252	0.162655	0.754301	0.706212	12.5651	7.13703	119.364	53.6479	262.68	56.2883	498.853	95.9771	8707.01	2.86887	0.108195
17JS59-07			65.4025	0.316406	0.0147811	0.431324	0.000519279	0.0213764	0.125724	0.0707244	1.32343	0.446702	5.04632	1.96351	9.15126	2.06687	20.5272	4.85322	9125.37	0.166094	0.140257
17JS59-08			124.622	0.710996	0	0.425092	0.00129322	0.0447501	0.0876074	0.098687	1.36668	0.54052	8.09348	3.7956	20.1542	4.73697	48.8078	10.859	8756.08	0.248213	0.114273
17JS59-09			1228.43	1.27097	0.00917653	3.57755	0.0486939	1.14597	3.4891	0.155115	21.8688	7.97059	98.6556	38.583	182.229	40.0926	390.407	86.6727	9949.11	1.13549	0.132265
17JS59-10			391.705	5.4077	0.00120618	0.311945	0	0.0759918	0.478399	0.478851	5.57222	2.34502	32.4663	13.2088	59.6203	13.0623	116.522	21.9188	10143.4	1.39456	0.123297
17JS59-11			447.044	3.62779	0	0.1257	0.001682	0.0595928	0.205352	0.255837	2.88307	1.70111	29.9159	13.9631	74.3968	17.4364	170.831	34.7303	9937.72	0.973931	0.103729
17JS59-12			237.808	1.45229	0.00457221	0.073505	0.00563477	0.0401339	0.159407	0.100821	1.61304	0.900542	15.3912	7.41329	40.5622	10.0696	100.967	21.2363	9764.77	0.499639	0.10592
17JS59-13			127.56	2.58397	0.00470698	0.0685194	0.00376927	0.0261778	0.0369168	0.0511124	1.04386	0.479045	8.16392	3.86221	22.2241	5.76345	58.4686	12.8934	9847.8	0.786794	0.104052
17JS59-14			223.747	4.74205	0.00325133	0.307186	0.00781157	0.14221	0.308241	0.231029	3.16032	1.31043	19.1156	7.3101	34.0488	7.15782	66.4957	12.0039	9631.76	1.22439	0.117654
17JS59-15			54.1469	0.450794	0	0.33354	0	0.0247209	0.150101	0.0984631	1.39543	0.502005	4.87609	1.70345	7.74947	1.68785	17.4708	4.41793	8439.97	0.114515	0.16009
17JS59-16			562.357	1.36594	0.00598807	2.33925	0.0131632	0.147181	0.837412	0.042592	6.29219	2.83293	38.748	17.1787	88.7857	20.9441	215.257	49.2069	10781.3	1.16719	0.125796
17JS59-17			78.6664	0.770668	0	0.883911	0.00671838	0.116517	0.301257	0.0776959	3.1265	0.881534	8.30204	2.52224	9.9171	1.8059	15.0382	2.89654	10922.2	0.358092	0.154269
17JS59-18			80.4139	0.568904	0	0.79999	0.00645186	0.107511	0.43569	0.100794	2.64997	0.849892	8.47385	2.54046	9.86055	1.81411	15.6847	3.18843	10095.1	0.310058	0.152806
17JS59-19			222.795	0.994858	0	0.640936	0.00541795	0.218224	1.18639	0.197062	8.68391	2.29978	20.4928	6.09054	23.1237	4.6074	42.7418	8.54851	10709.1	0.443088	0.157645
17JS59-20			988.03	2.8199	9.9435	28.8835	2.67696	12.2733	3.91753	3.80083	13.882	5.0886	67.8281	29.8837	157.55	38.6592	403.294	95.3222	14022.3	4.3295	0.124552
17JS59-21			876.318	3.01021	0.100459	0.275826	0.00768729	0.167415	0.678945	0.597344	8.26901	4.14433	65.6601	29.1074	148.161	32.9921	308.093	63.0347	9295.47	0.783401	0.112116
17JS59-22			154.848	0.671683	0	0.749566	0.00392954	0.203638	0.540853	0.229162	4.09236	1.34659	12.8925	4.42398	18.3284	3.40329	31.4093	6.97799	9446.14	0.199985	0.158564
17JS59-23			425.354	1.55692	0.00089863	0.610465	0.00144372	0.194732	0.581334	0.383205	5.06475	2.144	30.8346	13.7628	71.624	16.7524	161.132	34.3906	8523.16	0.388685	0.119445
17JS59-24			1190.4	22.3761	0.0281735	1.11378	0.0427589	0.87508	3.69965	3.03991	29.9642	10.1161	103.72	33.3833	148.521	35.6743	349.517	67.8491	11150.3	3.33287	0.151342
17JS59-25			490.401	9.6587	0.00356879	0.511651	0.00638377	0.133386	0.810946	0.443264	7.65608	3.18027	43.5863	16.6891	74.6156	15.2627	133.189	24.1502	9968.22	2.12735	0.124127
17JS59-26			139.444	0.877683	0.000561516	0.0925742	0.000725409	0	0.122969	0.087516	1.29824	0.724414	10.2161	4.3098	21.0403	4.74508	46.3997	9.36272	10454	0.384729	0.125828
17JS59-27			66.8221	0.413803	0	0.356648	0	0.0661848	0.172867	0.113574	1.77594	0.584242	5.96638	1.88022	7.82724	1.57115	14.294	2.99793	8643.2	0.113904	0.150922
17JS59-28			433.54	5.68239	0.00367164	0.290291	0.00266698	0.0818388	0.357029	0.292853	4.82217	2.22071	34.4534	14.434	69.8085	15.547	144.697	27.9947	10039.7	1.59428	0.113083
17JS59-29			496.152	8.74571	0	0.313943	0	0.1274	0.405836	0.457142	5.30186	2.62303	39.371	16.5545	78.9938	17.3571	155.092	29.0288	9579.49	1.8359	0.117433
17JS59-30			330.501	1.23382	0	0.402238	0.00404301	0.0972795	0.27021	0.197324	3.21151	1.40024	23.3936	10.7352	56.1052	13.1125	125.652	27.5264	9330.97	0.373384	0.105261
17JS59-31			84.9949	0.581833	0.0109201	0.740588	0.000377835	0.0532378	0.223185	0.163208	1.35754	0.58391	6.32627	2.28344	10.0474	2.20992	20.7961	4.60376	9569.79	0.121289	0.151985
17JS44 - Amphibolite - Group I
17JS44-01			923.874	2.32586	0.0088153	1.66953	0.0219459	0.621767	1.90758	0.19943	13.604	5.44443	71.3191	29.1075	142.072	32.8615	327.078	70.2257	9737.49	1.26781	0.0874174
17JS44-02			51.1279	0.707861	0.0519111	4.37987	0.164078	1.29604	1.07202	0.339247	2.00479	0.418764	4.39613	1.36354	5.77379	1.16599	11.1439	2.25519	8280.4	0.377966	0.697885
17JS44-03			622.506	2.25534	7.70781	93.2676	7.91479	50.9294	32.7221	7.20822	38.758	6.80153	58.1875	20.3512	100.089	25.4775	275.776	60.3488	10657.9	2.31367	0.617579
17JS44-04			101.814	0.137532	0.0015392	1.18083	0.00848448	0.036652	0.121562	0.0676683	0.916493	0.492861	6.75119	2.95512	16.6818	4.41321	51.8689	14.8486	9215.41	0.277416	0.444088
17JS44-05			568.553	3.08899	18.624	433.134	24.1777	157.658	82.83	18.8939	81.9702	10.8802	65.061	17.3004	71.1145	15.7437	156.116	32.4821	7777.62	0.940605	0.692912
17JS44-06			170.323	1.42964	0.0189202	13.4224	0.0472229	0.509186	1.10416	0.675706	5.20368	1.4806	14.8356	4.869	20.2737	4.14125	36.9537	7.1875	7591.76	0.426995	0.716075
17JS44-07			1206.03	1.07761	0.0538875	3.20438	0.120047	1.66128	4.29203	0.213065	25.6716	8.84311	105.678	40.0916	177.816	36.5766	332.108	67.5638	9372.77	0.70065	0.0480278
17JS44-08			218.729	0.214921	0.00738986	2.03678	0.00983823	0.178439	0.378174	0.180307	3.28161	1.25451	15.6545	6.8674	33.7456	8.23806	89.1832	22.9106	9577.05	0.300109	0.337162
17JS44-09			1582.63	5.04352	0.537313	21.4769	0.224306	2.24036	4.1991	1.18306	24.7932	9.42292	122.37	51.605	252.754	55.679	539.886	119.116	6848.6	1.33565	0.275469
17JS44-10			47.806	0.549482	0.066446	3.76028	0.0869614	0.682416	0.49514	0.187467	1.57362	0.411366	3.90144	1.25939	4.5238	0.929272	8.26017	1.54312	7661.87	0.410703	0.593401
17JS44-11			59.518	0.710648	0.167415	8.17466	0.421436	3.58759	2.86876	0.569995	3.34618	0.664444	5.53327	1.70447	6.64888	1.22662	10.0476	2.14137	7512.57	0.439576	0.561039
17JS44-12			1623.94	1.92673	0.0531256	27.2821	0.568204	8.2592	12.0402	2.54941	53.162	15.0696	160.379	55.6595	231.061	45.6884	400.748	80.5629	7238.06	0.655387	0.260562
17JS44-14			343.188	1.08774	0.00622831	3.53101	0.039599	0.49639	1.28767	0.729769	6.82593	2.41404	27.0248	9.70753	41.2238	8.39726	77.2983	16.0693	8929.66	1.37976	0.604444
17JS44-15			40.8283	0.0672686	0.0147556	0.454422	0.0065619	0.064273	0.12181	0.0481727	0.518808	0.199068	2.61181	1.22006	6.41524	1.765	20.7352	5.45385	8459.07	0.0844383	0.500225
17JS44-16			314.151	0.329573	0.10342	4.76832	0.166104	1.57216	1.63799	0.516701	5.99115	1.80973	22.7177	9.73248	51.1141	12.5071	138.437	37.4984	8425.46	0.457633	0.446999
17JS44-17			489.593	0.570131	0.388313	6.85991	0.371436	3.64735	2.61884	0.9067	8.4685	2.4077	33.048	15.3307	80.0091	19.6857	221.436	58.4753	7940.63	0.729313	0.53605
17JS44-18			239.253	1.52932	5.34164	29.8398	5.29344	41.912	13.2143	3.25493	14.1338	2.07169	19.5646	6.86792	30.5747	6.52345	61.4467	13.309	9570.73	2.67312	0.723442
17JS44-19			1398.33	1.73667	0.0384941	8.41963	0.179076	2.79539	5.63844	0.685733	33.5662	10.858	131.103	49.2233	214.418	43.4038	375.202	76.4426	8123.2	1.09089	0.118117
17JS44-20			33.2176	0.776762	0	2.40705	0.0172782	0.0779567	0.183385	0.0808149	0.832421	0.306381	2.93833	0.844231	3.46583	0.646756	5.71287	1.12655	7369.6	0.47334	0.530874
17JS44-21			234.573	0.222616	0.0038261	2.00138	0.0172487	0.358152	0.716995	0.360654	4.49006	1.4212	17.1878	7.13405	36.4162	8.69999	96.752	24.9146	8936.62	0.325786	0.468665
17JS44-22			443.85	1.30191	0.183982	6.11846	0.201127	1.79015	1.40183	0.515734	5.11874	1.8293	25.3005	12.7952	75.9257	20.0322	231.328	62.5086	9377.81	2.07192	0.521967
17JS44-23			231.322	0.232165	0.0106205	1.91033	0.02507	0.345614	0.699563	0.336411	3.54438	1.40237	17.2915	7.06837	36.6774	9.10572	99.9887	26.8793	9228.55	0.383647	0.531641
17JS44-24			134.169	0.210606	0.00325433	1.44239	0.0055178	0.0991962	0.247517	0.117078	1.45459	0.571847	8.65519	3.96757	22.3281	5.88469	68.2825	18.9251	9802.59	0.40609	0.464254
17JS44-25			104.796	0.288684	0.449861	6.89562	0.451857	4.1584	2.66213	0.536037	3.26337	0.700247	7.26654	3.00309	16.6817	4.35425	51.3806	14.047	10862.8	0.817594	0.555414
17JS44-26			143.238	1.35879	4.29649	22.3318	2.77391	17.502	7.05506	1.47414	7.61614	1.14628	10.1391	3.74435	19.8214	5.38883	59.6707	14.3321	7630.6	0.93634	0.611164
17JS44-27			479.329	2.06416	1.50657	31.4099	2.24923	15.1046	10.3719	2.56568	16.9066	4.00766	40.9386	15.0782	71.4133	16.1537	156.417	34.3131	8247.54	1.28492	0.589573
†Eu/Eu* = 2*EuN/(SmN+GdN); Normalization to chondrite in Sun & McDonough (1989).

## Sheet: Feuil4
	Ti	Y	Nb	La	Ce	Pr	Nd	Sm	Eu	Gd	Tb	Dy	Ho	Er	Tm	Yb	Lu	Hf	Ta	ƩREE	Eu/Eu*
	2.66149	210.288	3.26513	0.03495	0.484284	0.0799967	0.261497	0.188532	0.150275	1.22108	0.650304	11.8513	6.03502	35.4482	10.5574	115.792	25.1374	12920.8	1.91117	13344.1	0.0994925
	2.13831	522.083	1.25387	0	0.0787795	0.00256962	0.00968659	0.0818369	0.0584685	1.33265	1.09016	22.9945	14.0229	93.1739	27.4183	314.325	71.8136	9887.76	0.587801	10958.1	0.0896249
	2.97403	88.6069	0.697992	0	1.06948	0.00645321	0.143585	0.459147	0.112438	3.97578	1.09759	9.73646	2.92711	10.1635	1.74225	13.4667	2.69669	9793.48	0.284336	9930.66	0.160089
	1.91278	446.624	1.97589	0	0.145763	0	0.0479205	0.180885	0.223024	3.37626	1.75819	30.6558	14.2833	75.2432	17.5624	168.697	35.405	9462.98	0.547443	10259.7	0.103325
	2.36996	86.1196	1.0802	0.00121949	0.58126	0.00205579	0.0390671	0.159874	0.082267	1.62152	0.615368	6.98901	2.75781	12.329	2.80874	28.8915	6.74361	9445.12	0.501228	9596.44	0.142934
	1.8004	1682.19	6.90347	0.0145875	0.809159	0.000439252	0.162655	0.754301	0.706212	12.5651	7.13703	119.364	53.6479	262.68	56.2883	498.853	95.9771	8707.01	2.86887	11507.9	0.108195
	3.14034	65.4025	0.316406	0.0147811	0.431324	0.000519279	0.0213764	0.125724	0.0707244	1.32343	0.446702	5.04632	1.96351	9.15126	2.06687	20.5272	4.85322	9125.37	0.166094	9237.3	0.140257
	2.00485	124.622	0.710996	0	0.425092	0.00129322	0.0447501	0.0876074	0.098687	1.36668	0.54052	8.09348	3.7956	20.1542	4.73697	48.8078	10.859	8756.08	0.248213	8980.67	0.114273
	1.26288	1228.43	1.27097	0.00917653	3.57755	0.0486939	1.14597	3.4891	0.155115	21.8688	7.97059	98.6556	38.583	182.229	40.0926	390.407	86.6727	9949.11	1.13549	12054.8	0.132265
	3.01511	391.705	5.4077	0.00120618	0.311945	0	0.0759918	0.478399	0.478851	5.57222	2.34502	32.4663	13.2088	59.6203	13.0623	116.522	21.9188	10143.4	1.39456	10808	0.123297
	2.86748	447.044	3.62779	0	0.1257	0.001682	0.0595928	0.205352	0.255837	2.88307	1.70111	29.9159	13.9631	74.3968	17.4364	170.831	34.7303	9937.72	0.973931	10735.9	0.103729
	2.70578	237.808	1.45229	0.00457221	0.073505	0.00563477	0.0401339	0.159407	0.100821	1.61304	0.900542	15.3912	7.41329	40.5622	10.0696	100.967	21.2363	9764.77	0.499639	10203.1	0.10592
	1.49611	127.56	2.58397	0.00470698	0.0685194	0.00376927	0.0261778	0.0369168	0.0511124	1.04386	0.479045	8.16392	3.86221	22.2241	5.76345	58.4686	12.8934	9847.8	0.786794	10091.8	0.104052
	2.58637	223.747	4.74205	0.00325133	0.307186	0.00781157	0.14221	0.308241	0.231029	3.16032	1.31043	19.1156	7.3101	34.0488	7.15782	66.4957	12.0039	9631.76	1.22439	10013.1	0.117654
	2.32139	54.1469	0.450794	0	0.33354	0	0.0247209	0.150101	0.0984631	1.39543	0.502005	4.87609	1.70345	7.74947	1.68785	17.4708	4.41793	8439.97	0.114515	8535.09	0.16009
	1.50302	562.357	1.36594	0.00598807	2.33925	0.0131632	0.147181	0.837412	0.042592	6.29219	2.83293	38.748	17.1787	88.7857	20.9441	215.257	49.2069	10781.3	1.16719	11788.8	0.125796
	2.88973	78.6664	0.770668	0	0.883911	0.00671838	0.116517	0.301257	0.0776959	3.1265	0.881534	8.30204	2.52224	9.9171	1.8059	15.0382	2.89654	10922.2	0.358092	11047.8	0.154269
	2.20909	80.4139	0.568904	0	0.79999	0.00645186	0.107511	0.43569	0.100794	2.64997	0.849892	8.47385	2.54046	9.86055	1.81411	15.6847	3.18843	10095.1	0.310058	10222.9	0.152806
	4.83227	222.795	0.994858	0	0.640936	0.00541795	0.218224	1.18639	0.197062	8.68391	2.29978	20.4928	6.09054	23.1237	4.6074	42.7418	8.54851	10709.1	0.443088	11052.2	0.157645
	1.70512	988.03	2.8199	9.9435	28.8835	2.67696	12.2733	3.91753	3.80083	13.882	5.0886	67.8281	29.8837	157.55	38.6592	403.294	95.3222	14022.3	4.3295	15890.4	0.124552
	2.78715	876.318	3.01021	0.100459	0.275826	0.00768729	0.167415	0.678945	0.597344	8.26901	4.14433	65.6601	29.1074	148.161	32.9921	308.093	63.0347	9295.47	0.783401	10836.9	0.112116
	3.82866	154.848	0.671683	0	0.749566	0.00392954	0.203638	0.540853	0.229162	4.09236	1.34659	12.8925	4.42398	18.3284	3.40329	31.4093	6.97799	9446.14	0.199985	9686.46	0.158564
	3.83121	425.354	1.55692	0.00089863	0.610465	0.00144372	0.194732	0.581334	0.383205	5.06475	2.144	30.8346	13.7628	71.624	16.7524	161.132	34.3906	8523.16	0.388685	9287.94	0.119445
	15.1926	1190.4	22.3761	0.0281735	1.11378	0.0427589	0.87508	3.69965	3.03991	29.9642	10.1161	103.72	33.3833	148.521	35.6743	349.517	67.8491	11150.3	3.33287	13153.9	0.151342
	4.3982	490.401	9.6587	0.00356879	0.511651	0.00638377	0.133386	0.810946	0.443264	7.65608	3.18027	43.5863	16.6891	74.6156	15.2627	133.189	24.1502	9968.22	2.12735	10790.7	0.124127
	2.70124	139.444	0.877683	0.000561516	0.0925742	0.000725409	0	0.122969	0.087516	1.29824	0.724414	10.2161	4.3098	21.0403	4.74508	46.3997	9.36272	10454	0.384729	10693.1	0.125828
	2.98225	66.8221	0.413803	0	0.356648	0	0.0661848	0.172867	0.113574	1.77594	0.584242	5.96638	1.88022	7.82724	1.57115	14.294	2.99793	8643.2	0.113904	8748.16	0.150922
	3.37782	433.54	5.68239	0.00367164	0.290291	0.00266698	0.0818388	0.357029	0.292853	4.82217	2.22071	34.4534	14.434	69.8085	15.547	144.697	27.9947	10039.7	1.59428	10795.5	0.113083
	4.89236	496.152	8.74571	0	0.313943	0	0.1274	0.405836	0.457142	5.30186	2.62303	39.371	16.5545	78.9938	17.3571	155.092	29.0288	9579.49	1.8359	10431.9	0.117433
	3.25502	330.501	1.23382	0	0.402238	0.00404301	0.0972795	0.27021	0.197324	3.21151	1.40024	23.3936	10.7352	56.1052	13.1125	125.652	27.5264	9330.97	0.373384	9925.19	0.105261
	2.84231	84.9949	0.581833	0.0109201	0.740588	0.000377835	0.0532378	0.223185	0.163208	1.35754	0.58391	6.32627	2.28344	10.0474	2.20992	20.7961	4.60376	9569.79	0.121289	9704.89	0.151985
